# Supplementary material
Source: publisher figshare collection journal article supplement (https://tandf.figshare.com/ndownloader/files/16117982)
Supplement: Supplementary file 1 [file 16117982]

**Supplementary Table S1.** Search strategy applied to monitoring the studies using epigenetics and drug development to FDA approval .

| **Search strategy** | | **Number of publications** | | |
| --- | --- | --- | --- | --- |
| **2007-2017** | **2008-2018** | **2009-2019** |
| **Web of science publications** | ((Epigenomic OR epigenetic) AND (drugs OR compounds) AND “in vitro”) | 863 | 1140 | 1217 |
| ((Epigenomic OR epigenetic) AND (drugs OR compounds) AND “in vivo”) | 698 | 931 | 952 |
| ((Epigenomic OR epigenetic) AND (drugs OR compounds) AND (“pre clinical” OR “preclinical”)) | 323 | 465 | 465 |
| ((Epigenomic OR epigenetic) AND (drugs OR compounds) AND (“clinical studies”)) | 106 | 133 | 137 |
| **ClinicalTrials.gov** | ((Epigenomic OR epigenetic) AND (drugs OR compounds) AND (“clinical studies”)) | cancer | | 106 | 133 | 137 |
